# Supplementary material
Source: Research Square preprint supplement (doi:10.21203/rs.3.rs-9108647/v1)
Supplement: Supplementary file 1 [file 8109448b44c48f0393a13571.docx]

**6.4. Questionnaire:**

**Conceptual framework of factors influencing Hepatitis B preventive awareness and behaviors among Saudi women**

|  | No. | ………………………………………….. |
| --- | --- | --- |
| **Sociodemographic information** | | |
| 1 | Nationality | [ 1 ] Saudi  [ 2 ] Non Saudi |
| 2 | Age | ………………….. Years |
| 3 | Marital status | [ 1 ] Single  [ 2 ] Married  [ 3 ] Divorced  [ 4 ] Widowed |
| 4 | Highest education level | [ 1 ] Qur’anic/Islamiyyah only  [ 2 ] Primary  [ 3 ] Secondary  [ 4 ] Post-secondary  [ 5 ] University  [ 6 ] Postgraduate |
| 5 | Main Occupation | [ 1 ] House wife  [ 2 ] Educational  [ 3 ] Health professional  [ 4 ] Banking and business  [ 5 ] Military  [ 6 ] Student  [ 7 ]Others (specify)………….. |
| 6 | Residence | [1] Bisha city  [2] Bisha suburb |
| 7 | Family history of hepatitis B | [1] Present  [2] Absent |
| **Knowledge about Hepatitis B** | | |
| 8 | Have you ever heard of a disease termed as Hepatitis | [ 1 ] Yes  [ 2 ] No |
| 9 | Is Hepatitis B is a viral diseases | [ 1 ] Yes  [ 2 ] No |
| 10 | The early symptoms of Hepatitis B are same like cold and flu (fever, running nose, cough) | [ 1 ] Yes  [ 2 ] No |
| 11 | Can Hepatitis B affect liver | [ 1 ] Yes  [ 2 ] No |
| 12 | Is vaccination available for Hepatitis B | [ 1 ] Yes  [ 2 ] No |
| 13 | Jaundice is one of the common symptoms of Hepatitis B | [ 1 ] Yes  [ 2 ] No |
| 14 | Are there no symptoms of the Hepatitis B in some of the patients | [ 1 ] Yes  [ 2 ] No |
| 15 | Can Hepatitis B be transmitted by contaminated blood and blood products | [ 1 ] Yes  [ 2 ] No |
| 16 | History of traditional scares or tattoo | [ 1 ] Yes  [ 2 ] No |
| 17 | Can Hepatitis B be transmitted by unsafe sex | [ 1 ] Yes  [ 2 ] No |
| 18 | Can Hepatitis B be transmitted from mother to child | [ 1 ] Yes  [ 2 ] No |
| 19 | Can Hepatitis B be transmitted by contaminated water/food prepared by person suffering with these infections | [ 1 ] Yes  [ 2 ] No |
| 20 | Can Hepatitis B be transmitted by using blades of the barber/ear and nose piercing | [ 1 ] Yes  [ 2 ] No |
| **Attitudes about Hepatitis B infection** | | |
| 21 | Is it important to get tested for hepatitis B | [ 1 ] Yes  [ 2 ] No |
| 22 | You like to get vaccinated for hepatitis B | [ 1 ] Yes  [ 2 ] No |
| 23 | Hepatitis B infected women should be isolated from the people to prevent their spread | [ 1 ] Yes  [ 2 ] No |
| 24 | If you are found positive for hepatitis B without any symptom, you will get further investigation and treatment | [ 1 ] Yes  [ 2 ] No |
| 25 | If you are found positive for hepatitis B , you will disclose it to others | [ 1 ] Yes  [ 2 ] No |
| 26 | What would be your reaction if you found that you have Hepatitis B | [ 1 ] Fear  [ 2 ] Shame  [ 3 ] Surprise  [ 4 ] Sadness |
| 27 | What worries you most if you will be diagnosed with Hepatitis B | [ 1 ] Fear of death  [ 2 ] Fear of disease spread to family  [ 3 ] Cost of treatment  [ 4 ] Isolation from the society |
| **Practice preventing Hepatitis infection during your hospital visit** | | |
| 28 | Have you done screening for Hepatitis | [ 1 ] Yes  [ 2 ] No |
| 29 | Have you got yourself vaccinated against Hepatitis | [ 1 ] Yes  [ 2 ] No |
| 30 | Do you ask for a new syringe before use | [ 1 ] Yes  [ 2 ] No |
| 31 | Do you ask for screening of blood before transfusion | [ 1 ] Yes  [ 2 ] No |
| 32 | What will you do if you think that you have symptoms of Hepatitis B | [ 1 ] Go to health facility  [ 2 ] Go to expert  [ 3 ] Go to Homeopath  [ 4 ] Go to Traditional healer |
| 33 | In case you are diagnosed with Hepatitis , would you go for further investigation and treatment | [ 1 ] Yes  [ 2 ] No |
| 34 | Have you ever participated in health education program related to Hepatitis | [ 1 ] Yes  [ 2 ] No |
